# Supplementary material for: Neoadjuvant Chemotherapy in Early Triple-Negative Breast Cancer: A Pairwise and Network Meta-Analysis of Pathological Complete Response
Source: PubMed Central journal article supplement — Inquiry. 2021 Nov 20;58:00469580211056213. doi: 10.1177/00469580211056213 (PMC8606982; doi:10.1177/00469580211056213), 2021-11-20

Figure S1. Risk table of included trials.

|                      | Risk of bias domains |    |    |    |    | Overall |
|----------------------|----------------------|----|----|----|----|---------|
|                      | D1                   | D2 | D3 | D4 | D5 |         |
| Alba E 2012          | -                    | +  | +  | +  | +  | +       |
| Ando M 2014          | -                    | +  | +  | +  | +  | +       |
| GeparOLA 2019        | +                    | +  | +  | +  | +  | +       |
| Gianni L 2018        | +                    | +  | +  | +  | +  | +       |
| Gianni L 2019        | +                    | +  | +  | +  | +  | +       |
| Gluz O 2017          | +                    | +  | +  | +  | +  | +       |
| Loibl S 2018         | +                    | +  | +  | +  | +  | +       |
| Loibl S 2019         | +                    | +  | +  | +  | +  | +       |
| Martinez MCA 2015    | -                    | +  | -  | +  | +  | -       |
| Rugo HS 2016         | +                    | +  | +  | +  | +  | +       |
| Schmid P 2020        | +                    | +  | +  | +  | +  | +       |
| Schneeweiss A 2019   | +                    | +  | +  | +  | +  | +       |
| Sharma P 2019        | -                    | +  | -  | +  | +  | -       |
| Sikov WM 2015        | +                    | +  | +  | +  | +  | +       |
| Untch M 2016         | +                    | +  | +  | +  | +  | +       |
| von Minckwitz G 2014 | +                    | +  | +  | +  | +  | +       |
| Wang K 2020          | +                    | +  | -  | +  | +  | +       |
| Zhang P 2016         | -                    | +  | +  | +  | +  | +       |

Study

Domains:  
D1: Bias due to randomisation.  
D2: Bias due to deviations from intended intervention.  
D3: Bias due to missing data.  
D4: Bias due to outcome measurement.  
D5: Bias due to selection of reported result.

Judgement  
+ Low  
- Some concerns

Figure S2. Funnel plot.

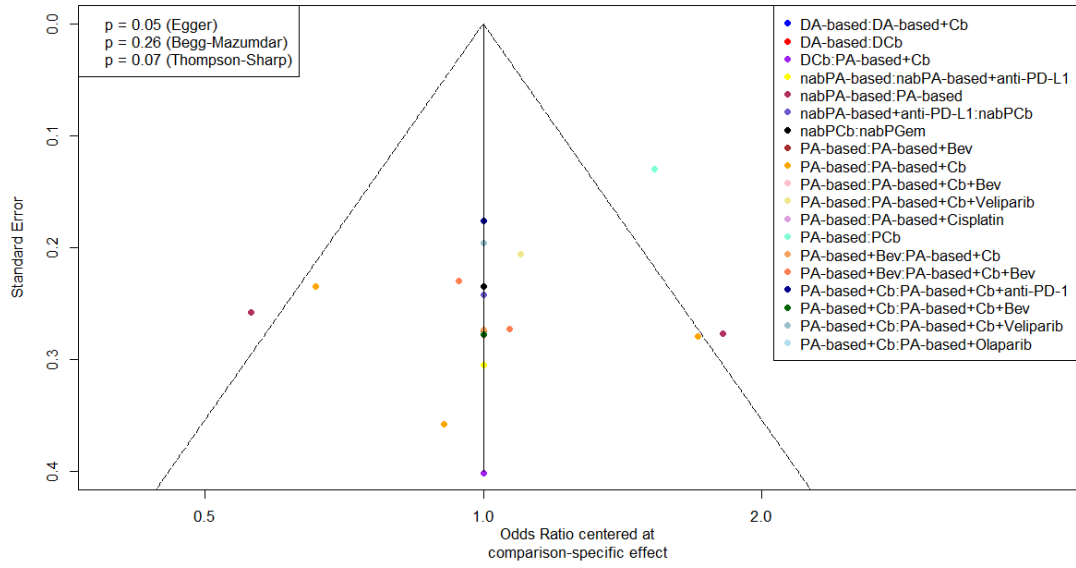

Figure S3. Net heat plot.

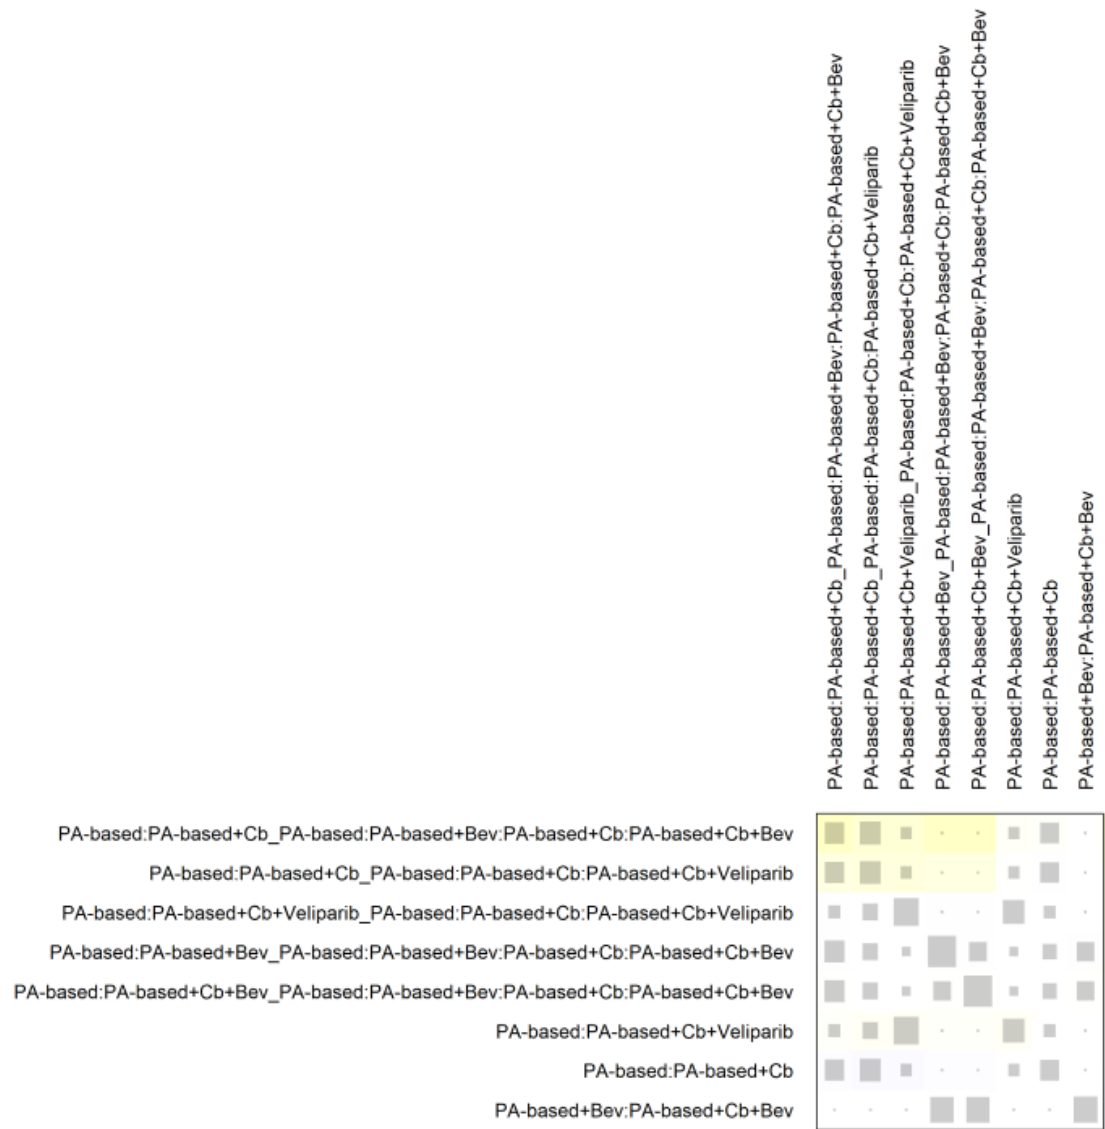

Figure S4. Forest plot of odds Ratios comparing neuropathy.

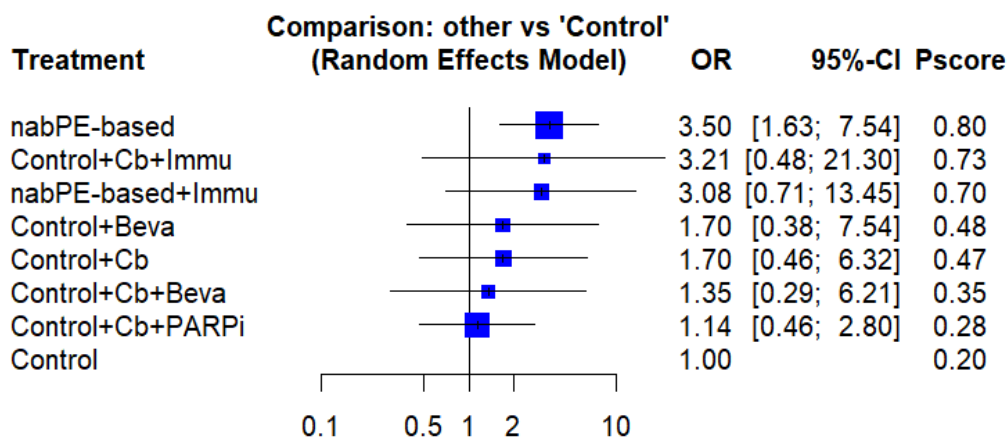

Figure S5. Forest plot of odds Ratios comparing vomiting.

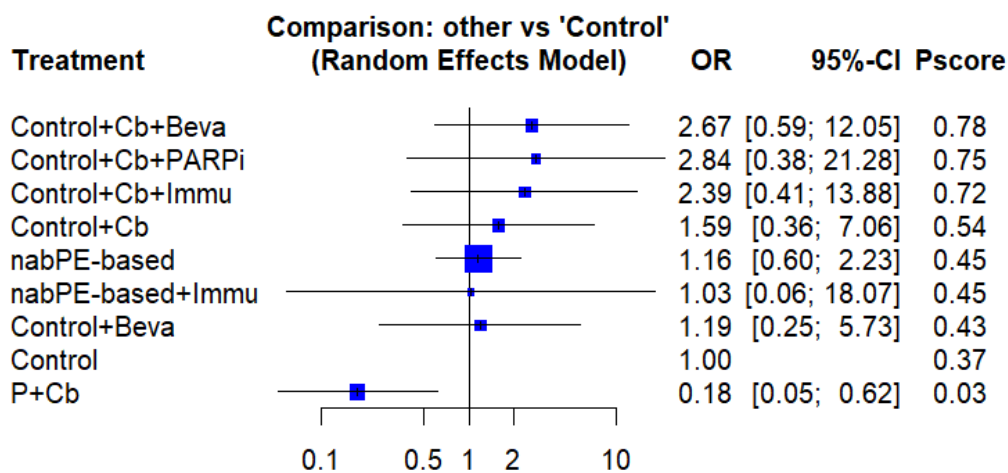

Figure S6. Forest Plot of Odds Ratios Comparing neutropenia.

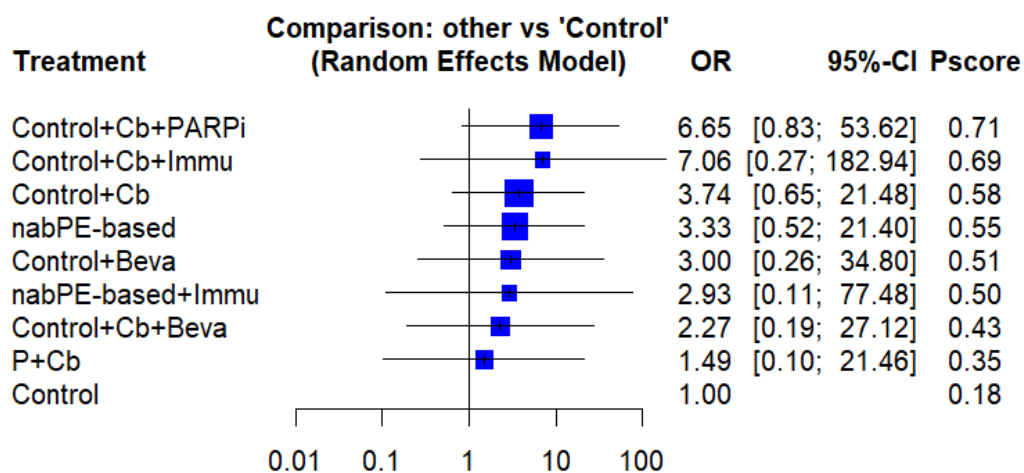

Figure S7. Forest Plot of Odds Ratios Comparing thrombocytopenia.

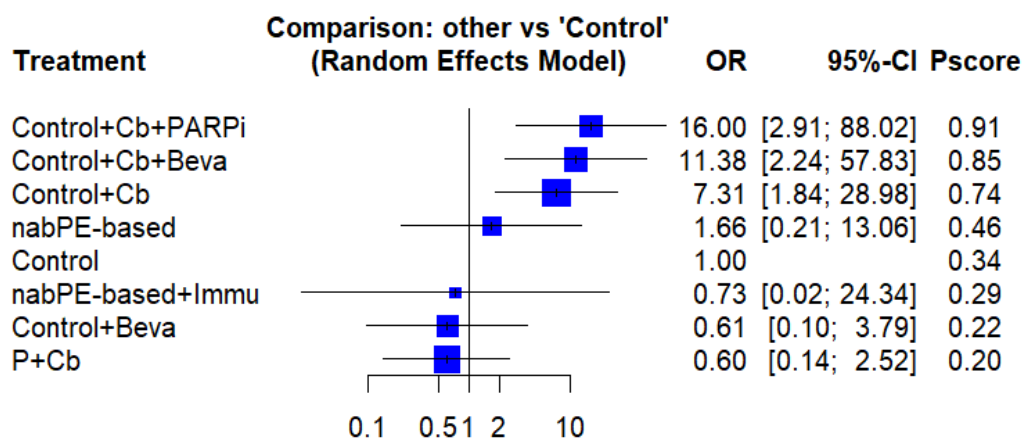

Figure S8. Forest Plot of Odds Ratios Comparing anemia.

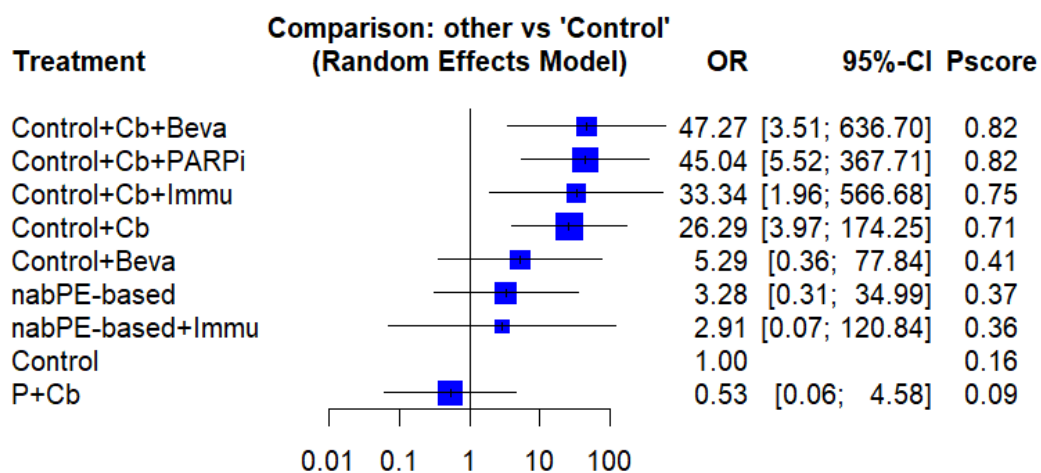

Supplement: sj-pdf-1-inq-10.1177_00469580211056213.pdf [file sj-pdf-1-inq-10.1177_00469580211056213.pdf]
