# Supplementary material for: Neoadjuvant Chemotherapy in Early Triple-Negative Breast Cancer: A Pairwise and Network Meta-Analysis of Pathological Complete Response
Source: PubMed Central journal article supplement — Inquiry. 2021 Nov 20;58:00469580211056213. doi: 10.1177/00469580211056213 (PMC8606982; doi:10.1177/00469580211056213), 2021-11-20
Supplement: sj-pdf-2-inq-10.1177_00469580211056213.pdf [file sj-pdf-2-inq-10.1177_00469580211056213.pdf]

Table S2 Treatment details in included trials.

| Study         | Treatments  |                                                                                                                                                                                                                                                                          |
|---------------|-------------|--------------------------------------------------------------------------------------------------------------------------------------------------------------------------------------------------------------------------------------------------------------------------|
| GEICAM        | EC-D        | Epirubicin 90 mg/m <sup>2</sup> plus cyclophosphamide 600 mg/m <sup>2</sup> for 4 cycles; docetaxel 100 mg/m <sup>2</sup> for 4 cycles                                                                                                                                   |
|               | EC→DCb      | Epirubicin 90 mg/m <sup>2</sup> plus cyclophosphamide 600mg/m <sup>2</sup> for 4 cycles; docetaxel 75mg/m <sup>2</sup> plus carboplatin AUC 6 for 4 cycles                                                                                                               |
| UMIN000003355 | P→CEF       | Four cycles of weekly paclitaxel (80 mg/m <sup>2</sup> , day 1, 8, 15) followed by four cycles of CEF (cyclophosphamide 500/epirubicin 100/5-fluorouracil 500 mg/ m <sup>2</sup> )                                                                                       |
|               | PCb→CEF     | Four 3-week cycles of carboplatin AUC 5 and weekly paclitaxel (80 mg/ m <sup>2</sup> , day 1, 8, 15) followed by four cycles of CEF (cyclophosphamide 500/epirubicin 100/5-fluorouracil 500 mg/ m <sup>2</sup> )                                                         |
| GeparSixto    | P+A+Beva    | 18 weeks with paclitaxel (80 mg/ m <sup>2</sup> weekly), non-pegylated liposomal doxorubicin (20 mg/ m <sup>2</sup> weekly), and bevacizumab (15 mg/kg intravenously every 3 weeks for 6 cycles)                                                                         |
|               | P+A+Beva+Cb | 18 weeks with paclitaxel (80 mg/ m <sup>2</sup> weekly), non-pegylated liposomal doxorubicin (20 mg/ m <sup>2</sup> weekly), carboplatin (AUC 1.5 weekly), and bevacizumab (15 mg/kg intravenously every 3 weeks for 6 cycles)                                           |
| Mexico        | P→AC        | Weekly paclitaxel 80 mg/ m <sup>2</sup> by 12, followed to 5FU, doxorubicin and cyclophosphamide 500/50/500 mg/ m <sup>2</sup> every 3 weeks times 4                                                                                                                     |
|               | PCis→AC     | Cisplatin 30 mg/ m <sup>2</sup> plus weekly paclitaxel 80 mg/ m <sup>2</sup> by 12 cycles, followed to cisplatin 75 mg/ m <sup>2</sup> plus doxorubicin 50 mg/ m <sup>2</sup> every 3 weeks for 4 cycles                                                                 |
| CALGB 40603   | P→AC        | paclitaxel 80 mg/ m <sup>2</sup> once per week for 12 weeks, followed by doxorubicin plus cyclophosphamide once every 2 weeks for four cycles                                                                                                                            |
|               | P+Bev→AC    | paclitaxel 80 mg/ m <sup>2</sup> once per week for 12 weeks, followed by doxorubicin plus cyclophosphamide once every 2 weeks for four cycles, bevacizumab 10 mg/kg once every 2 weeks for nine cycles.                                                                  |
|               | P+Cb→AC     | paclitaxel 80 mg/ m <sup>2</sup> once per week for 12 weeks, followed by doxorubicin plus cyclophosphamide once every 2 weeks for four cycles, concurrent carboplatin AUC 6 once every 3 weeks for four cycles                                                           |
|               | P+Cb+Bev→AC | paclitaxel 80 mg/ m <sup>2</sup> once per week for 12 weeks, followed by doxorubicin plus cyclophosphamide once every 2 weeks for four cycles, concurrent carboplatin AUC 6 once every 3 weeks for four cycles, bevacizumab 10 mg/kg once every 2 weeks for nine cycles. |
| GeparSepto    | P→AC        | 12 weeks paclitaxel 90 mg/ m <sup>2</sup> (after study amendment, 125 mg/ m <sup>2</sup> ) on days 1, 8, and 15 for four 3-week cycles, epirubicin 90 mg/m <sup>2</sup> plus cyclophosphamide 600 mg/m <sup>2</sup> on day 1 for four 3-week cycles                      |

|              |                   |                                                                                                                                                                                                                                                                                                         |
|--------------|-------------------|---------------------------------------------------------------------------------------------------------------------------------------------------------------------------------------------------------------------------------------------------------------------------------------------------------|
|              | nabP→AC           | 12 weeks nab-paclitaxel 150 mg/m <sup>2</sup> (after study amendment, 125 mg/m <sup>2</sup> ) on days 1, 8, and 15 for four 3-week cycles, epirubicin 90 mg/m <sup>2</sup> plus cyclophosphamide 600 mg/m <sup>2</sup> on day 1 for four 3-week cycles                                                  |
| I-SPY2       | P-AC              | weekly paclitaxel 80 mg/ m <sup>2</sup> for 12 doses, doxorubicin (60 mg/ m <sup>2</sup> ) and cyclophosphamide (600 mg/ m <sup>2</sup> ) every 2 to 3 weeks for four doses                                                                                                                             |
|              | P+Cb+Veli→AC      | weekly paclitaxel 80 mg/ m <sup>2</sup> for 12 doses, doxorubicin (60 mg/ m <sup>2</sup> ), veliparib 50 mg by mouth twice daily for 12 weeks and carboplatin on weeks 1, 4, 7, and 10, concurrent with weekly paclitaxel; cyclophosphamide (600 mg/ m <sup>2</sup> ) every 2 to 3 weeks for four doses |
| Zhang et al. | PCb               | paclitaxel (175 mg/ m <sup>2</sup> , day1) plus carboplatin (AUC 5, day2), every three weeks for 4-6 cycles                                                                                                                                                                                             |
|              | PE                | epirubicin (75mg/ m <sup>2</sup> , day1) plus paclitaxel (175 mg/ m <sup>2</sup> , day2) , every three weeks for 4-6 cycles                                                                                                                                                                             |
| WSG-ADAPT-TN | nabP+Cb           | nab-paclitaxel 125 mg/ m <sup>2</sup> , carboplatin AUC2 day 1,8 q3w                                                                                                                                                                                                                                    |
|              | nabP+Gem          | nab-paclitaxel 125 mg/ m <sup>2</sup> , gemcitabine 1000 mg/ m <sup>2</sup> d1,8 three times weekly (q3w)                                                                                                                                                                                               |
| BrightNess   | P→AC              | paclitaxel (80 mg/ m <sup>2</sup> weekly for 12 doses), doxorubicin and cyclophosphamide every 2–3 weeks for four cycles                                                                                                                                                                                |
|              | P+Cb→AC           | paclitaxel (80 mg/ m <sup>2</sup> weekly for 12 doses) plus carboplatin (AUC 6 every 3 weeks, for four cycles), doxorubicin and cyclophosphamide every 2–3 weeks for four cycles                                                                                                                        |
|              | P+Cb+Veli→AC      | paclitaxel (80 mg/ m <sup>2</sup> weekly for 12 doses) plus carboplatin (AUC 6 every 3 weeks, for four cycles) plus veliparib (50 mg orally, twice a day), doxorubicin and cyclophosphamide every 2–3 weeks for four cycles                                                                             |
| ETNA         | P→AC              | paclitaxel 90 mg/ m <sup>2</sup> on weeks 1, 2, and 3, followed by a 1-week rest, for 4 cycles: 4 cycles of an anthracycline regimen per the investigator's choice                                                                                                                                      |
|              | nabP→AC           | nab-paclitaxel group received 125mg/ m <sup>2</sup> on weeks 1, 2, and 3, followed by a 1-week rest, for 4 cycles; 4 cycles of an anthracycline regimen per the investigator's choice.                                                                                                                  |
| GeparNeuvo   | nabP→AC           | Nab-paclitaxel 125 mg/ m <sup>2</sup> weekly for 12 weeks, EC every 2 weeks for 4 cycles                                                                                                                                                                                                                |
|              | nabP+Durv→AC+Durv | Nab-paclitaxel 125 mg/ m <sup>2</sup> weekly for 12 weeks, EC every 2 weeks for 4 cycles; durvalumab (0.75g) 2 weeks before start of chemotherapy, then 1.5 g every 3 weeks with chemotherapy for 6 cycles.                                                                                             |
| GeparOLA     | P+Olap→AC         | 12 cycles of paclitaxel weekly 80mg/ m <sup>2</sup> plus olaparib 100mg twice daily; epirubicin/cyclophosphamide 90/600 mg/ m <sup>2</sup> q2w or q3w                                                                                                                                                   |
|              | P+Cb→AC           | 12 cycles of paclitaxel weekly 80mg/ m <sup>2</sup> plus carboplatin AUC 2;                                                                                                                                                                                                                             |

|              |                     |                                                                                                                                                                                                                                                                                                                                               |
|--------------|---------------------|-----------------------------------------------------------------------------------------------------------------------------------------------------------------------------------------------------------------------------------------------------------------------------------------------------------------------------------------------|
|              |                     | Epirubicin/Cyclophosphamide 90/600 mg/m <sup>2</sup> q2w or q3w                                                                                                                                                                                                                                                                               |
| NeoTRIP      | nabP+Cb+Ate         | Carboplatin (AUC2) + nab-paclitaxel (125 mg/ m <sup>2</sup> ) weekly for 2 weeks every 3; 8 cycles; Atezolizumab (1200mg) day 1 every 3 weeks for 8 cycles                                                                                                                                                                                    |
|              | nabP+Cb             | Carboplatin (AUC2), nab-paclitaxel (125 mg/ m <sup>2</sup> ) weekly for 2 weeks every 3; 8 cycles                                                                                                                                                                                                                                             |
| GeparOcto    | E→P→C               | 18 weeks of epirubicin (150 mg/ m <sup>2</sup> ) followed by paclitaxel (225 mg/ m <sup>2</sup> ) followed by cyclophosphamide (2000 mg/ m <sup>2</sup> ), each q2w for 3 cycles                                                                                                                                                              |
|              | PMCB                | weekly paclitaxel (80 mg/ m <sup>2</sup> ) plus non-pegylated liposomal doxorubicin (20 mg/ m <sup>2</sup> ) plus carboplatin (AUC 1.5)                                                                                                                                                                                                       |
| NeoStop      | PCb→AC              | paclitaxel 80 mg/ m <sup>2</sup> weekly for 12 cycles; carboplatin (AUC 6) every 3 weeks for 4 cycles, followed by doxorubicin 60 mg/ m <sup>2</sup> cyclophosphamide 600 mg/m <sup>2</sup> every 2 weeks for 4 cycles                                                                                                                        |
|              | DCb                 | carboplatin (AUC 6) plus docetaxel (75 mg/ m <sup>2</sup> ) every 21 days for 6 cycles                                                                                                                                                                                                                                                        |
| TBCRC 030    | Cis                 | cisplatin (75 mg/ m <sup>2</sup> every 3 weeks for 4 doses)                                                                                                                                                                                                                                                                                   |
|              | P                   | paclitaxel 80 mg/ m <sup>2</sup> weekly for 12 cycles                                                                                                                                                                                                                                                                                         |
| TBCRC 031    | Cis                 | cisplatin (75 mg/ m <sup>2</sup> every 3 weeks for 4 doses)                                                                                                                                                                                                                                                                                   |
|              | AC                  | doxorubicin 60 mg/ m <sup>2</sup> ; cyclophosphamide 600 mg/ m <sup>2</sup> every 2-3 weeks for 4 doses                                                                                                                                                                                                                                       |
| KEYNOTE 522  | P+Cb+Pem→AC+Pem     | Pembrolizumab (200 mg) every 3 weeks plus paclitaxel (80 mg/ m <sup>2</sup> weekly) plus carboplatin (AUC 5 every 3 weeks or 1.5 weekly) for 12 weeks; four cycles of pembrolizumab plus doxorubicin (60 mg/ m <sup>2</sup> ) or epirubicin (90 mg/ m <sup>2</sup> ) plus cyclophosphamide (600 mg/ m <sup>2</sup> every 3 weeks in 12 weeks) |
|              | P+Cb→AC             | Placebo (200 mg) every 3 weeks plus paclitaxel (80 mg/ m <sup>2</sup> weekly) plus carboplatin (AUC 5 every 3 weeks or 1.5 weekly) for 12 weeks; four cycles of placebo plus doxorubicin (60 mg/ m <sup>2</sup> ) or epirubicin (90 mg/ m <sup>2</sup> ) plus cyclophosphamide (600 mg/ m <sup>2</sup> every 3 weeks in 12 weeks)             |
| NeoCart      | EC→D                | epirubicin 90 mg/ m <sup>2</sup> plus cyclophosphamide 600 mg/ m <sup>2</sup> four cycles, followed by docetaxel 100 mg/ m <sup>2</sup> for four cycles                                                                                                                                                                                       |
|              | DCb                 | docetaxel (75 mg/ m <sup>2</sup> ) plus carboplatin (AUC 6) for six cycles                                                                                                                                                                                                                                                                    |
| IMpassion031 | nabP→AC             | Nab-paclitaxel 125 mg/ m <sup>2</sup> weekly for 12 weeks, then four cycles plus doxorubicin (60 mg/ m <sup>2</sup> ) plus cyclophosphamide (600 mg/ m <sup>2</sup> every 2 weeks)                                                                                                                                                            |
|              | nabP+Atezo→AC+Atezo | Nab-paclitaxel 125 mg/ m <sup>2</sup> weekly for 12 weeks, then four cycles plus doxorubicin (60 mg/ m <sup>2</sup> ) plus cyclophosphamide (600 mg/ m <sup>2</sup> every 2 weeks); atezolizumab 840 mg every 2 weeks                                                                                                                         |
